# Supplementary material
Source: publisher figshare collection journal article supplement (https://acs.figshare.com/ndownloader/files/5781510)
Supplement: Supplementary file 1 [file 5781510]

**REVISED**

**JO011178M**

**REVISED**

**Thallium Trinitrate Mediated Oxidation of  
3-Alkenols: Ring Contraction vs Cyclization**

Helena M. C. Ferraz\* and Luiz S. Longo Jr.

Instituto de Química, Universidade de São Paulo,  
CEP 05508-900, São Paulo SP, Brazil.

Julio Zukerman-Schpector

Departamento de Química, Universidade Federal de São Carlos,  
CEP 13565-905, São Carlos SP, Brazil.

hmferraz@iq.usp.br

**Supporting Information**

**General procedure for the preparation of the 3-alkenols.<sup>1,2</sup> 2-Cyclohex-1-enyl-ethanol (4a):<sup>3</sup>** To a stirred suspension of  $\text{Zn}^4$  (3.92 g, 60.0 mmol), benzene (50 mL), cyclohexanone (5.39 g, 55.0 mmol) and iodine (one crystal) was added ethyl 2-bromoacetate (6.43 mL, 58.0 mmol). The mixture was refluxed for 2.5 h (**CAUTION!** a vigorous reflux is observed in the beginning) and 10% aqueous  $\text{H}_2\text{SO}_4$  was added at 0 °C. The aqueous phase was extracted with ethyl acetate (twice) and

the combined organic phases were washed with brine and dried over anhydrous  $\text{MgSO}_4$ . The solvent was removed under reduced pressure to give **1a** (9.52 g, 51.2 mmol, 93%). When necessary, the hydroxy-esters was separated from the unreacted starting materials by distillation.

To a stirred solution of the hydroxy-ester **1a** (9.30 g, 50.0 mmol) in anhydrous  $\text{Et}_2\text{O}$  (50 mL) at  $0^\circ\text{C}$  was added  $\text{SOCl}_2$ <sup>5</sup> (4.74 mL, 65.0 mmol) and dry pyridine (10 drops). The mixture was stirred for 48 h at room temperature and saturated aqueous  $\text{NaHCO}_3$  was added. The aqueous phase was extracted with ethyl acetate (three times) and the combined organic phases were washed with brine (twice) and dried over anhydrous  $\text{MgSO}_4$ . The solvent was removed under reduced pressure and the crude product was distilled ( $52\text{--}53^\circ\text{C}$ , 0.30 mmHg) to afford a 3:7 mixture (by GC and  $^1\text{H}$  NMR) of  $\alpha,\beta$ - and  $\beta,\gamma$ -unsaturated esters (6.38 g, 38.0 mmol).

The mixture of the esters mentioned above (6.38 g, 38.0 mmol) was dissolved in ethanol (38 mL). To this solution, 10% aqueous  $\text{NaOH}$  (38 mL) was added dropwise at  $10^\circ\text{C}$ . The mixture was stirred for 20 minutes at  $30^\circ\text{C}$  and water was added. The aqueous phase was extracted with ether (three times) and the combined organic phases were washed with brine (twice) and dried over anhydrous  $\text{MgSO}_4$ . The solvent was removed under reduced pressure to give the  $\alpha,\beta$ -unsaturated ester **2a** (1.34 g, 7.98 mmol, 16% from **1a**). Concentrated  $\text{HCl}$  was added to the aqueous phase, which was extracted with ether (three times). The new combined organic phases were washed with brine (twice) and dried over anhydrous  $\text{MgSO}_4$ . The solvent was removed under reduced pressure to give the  $\beta,\gamma$ -unsaturated acid **3a**

(3.43 g, 24.5 mmol, 49% from **1a**), which was submitted to the next step without purification.

To a stirred suspension of  $\text{LiAlH}_4$  (1.37 g, 36.0 mmol) in anhydrous THF (24 mL) at  $0^\circ\text{C}$  was added dropwise a solution of the acid **2a** (3.36 g, 24.0 mmol) in anhydrous THF (24 mL). The mixture was stirred for 5 h at room temperature and water was carefully added dropwise followed by 10% aqueous  $\text{H}_2\text{SO}_4$ . The aqueous phase was extracted with ethyl acetate (twice) and the combined organic phases were washed with brine and dried with anhydrous  $\text{MgSO}_4$ . The solvent was removed under reduced pressure and the crude product was purified by flash chromatography (hexanes:AcOEt 7:3 as eluent), affording **4a**<sup>3</sup> (2.57 g, 20.4 mmol, 85%) as a viscous colorless oil.  $^1\text{H}$  NMR (300 MHz,  $\text{CDCl}_3$ )  $\delta$  1.52-1.67 (m, 4H), 1.77 (br s, OH), 1.92-2.04 (m, 4H), 2.21 (t,  $J=6.3$  Hz, 2H), 3.66 (t,  $J=6.3$  Hz, 2H), 5.51-5.54 (m, 1H);  $^{13}\text{C}$  NMR (75 MHz,  $\text{CDCl}_3$ )  $\delta$  22.4, 22.9, 25.3, 28.1, 41.2, 60.3, 124.3, 134.1.

The 3-alkenols **4b-f** and **8** were prepared following the general procedure described above, starting from the corresponding cycloketone and bromoester (see Scheme 2).

**2-Cyclohex-1-enyl-propan-1-ol (4b):**<sup>6</sup> viscous colorless oil;  $^1\text{H}$  NMR (300 MHz,  $\text{CDCl}_3$ )  $\delta$  0.99 (d,  $J=6.9$  Hz, 3H), 1.54-1.66 (m, 4H, OH), 1.89-2.05 (m, 4H), 2.26 (sextet,  $J=6.9$  Hz, 1H), 3.43-3.51 (m, 2H), 5.52-5.54 (m, 1H);  $^{13}\text{C}$  NMR (75 MHz,  $\text{CDCl}_3$ )  $\delta$  15.4, 22.7, 22.9, 25.2, 25.3, 43.9, 65.4, 123.3, 138.6.

**2-(4-Methyl-cyclohex-1-enyl)-ethanol (4c):** viscous colorless oil; IR (film) 3348, 2908, 1455, 1435, 1044  $\text{cm}^{-1}$ ;  $^1\text{H}$  NMR (300 MHz,  $\text{CDCl}_3$ )  $\delta$  0.95 (d,  $J=6.3$  Hz, 3H), 1.16-1.29 (m, 1H), 1.54-1.74 (m, 3H, OH), 1.96-2.11 (m, 3H), 2.21 (t,  $J=6.3$  Hz, 2H), 3.65 (t,  $J=6.3$  Hz, 2H), 5.47-5.49 (m, 1H);  $^{13}\text{C}$  NMR (75 MHz,  $\text{CDCl}_3$ )  $\delta$  21.7, 28.2, 28.4, 31.2, 33.9, 40.8, 60.3, 123.8, 133.8; MS  $m/z$  (%) 140 (16,  $\text{M}^+$ ), 122 (15), 107 (52), 93 (100), 79 (66), 67 (91), 55 (55). The compound was mentioned in the literature<sup>7</sup> with no characterization and analytical data.

**2-(4-*tert*-Butyl-cyclohex-1-enyl)-ethanol (4d):**<sup>8</sup> viscous colorless oil;  $^1\text{H}$  NMR (300 MHz,  $\text{CDCl}_3$ )  $\delta$  0.86 (s, 9H), 1.07-1.31 (m, 2H), 1.68-1.91 (m, 2H, OH), 1.99-2.09 (m, 3H), 2.22 (t,  $J=6.3$  Hz, 2H), 3.66 (t,  $J=6.3$  Hz, 2H), 5.52-5.53 (br s, 1H);  $^{13}\text{C}$  NMR (75 MHz,  $\text{CDCl}_3$ )  $\delta$  24.2, 26.9, 27.2, 29.6, 32.2, 40.6, 44.2, 60.3, 124.5, 133.9.

**2-(4-Methyl-cyclohex-1-enyl)-propan-1-ol (4e):** viscous colorless oil; IR (film) 3371, 2922, 1456, 1032  $\text{cm}^{-1}$ ;  $^1\text{H}$  NMR (500 MHz,  $\text{CDCl}_3$ )  $\delta$  0.95 (d,  $J=6.2$  Hz, 3H), 0.98 e 1.00 (d,  $J=3.8$  Hz, d,  $J=3.8$  Hz, 3H), 1.16-1.26 (m, 1H), 1.57-1.75 (m, 3H, OH), 1.91-2.12 (m, 3H), 2.24-2.31 (m, 1H), 3.43-3.50 (m, 2H), 5.49-5.50 (m, 1H);  $^{13}\text{C}$  NMR (125 MHz,  $\text{CDCl}_3$ )  $\delta$  15.2/15.7, 21.7/21.8, 25.1/25.6, 28.6/28.7, 31.1/31.3, 33.8/33.9, 43.5/43.6, 65.4/65.5, 122.7/122.9, 138.2/138.3; MS  $m/z$  (%) 154 (9.3,  $\text{M}^+$ ), 136 (10), 123 (88), 107 (24), 95 (27), 81 (100), 67 (46), 55 (27); HRMS Calcd for  $\text{C}_{10}\text{H}_{12}\text{O}_2$ : 154.1357; Found: 154.1324.

**2-(4-*tert*-Butyl-cyclohex-1-enyl)-propan-1-ol (4f):** viscous colorless; IR (film) 3355, 2958, 1469, 1364, 1037, 1024  $\text{cm}^{-1}$ ;  $^1\text{H}$  NMR (300 MHz,  $\text{CDCl}_3$ )  $\delta$  0.87 (s, 9H), 0.98 e 1.00 (d,  $J=3.0$  Hz, d,  $J=3.0$  Hz, 3H), 1.07-1.29 (m, 2H), 1.42 (br s, OH), 1.67-2.01 (m, 5H), 2.26-2.32 (m, 1H), 3.44-3.48 (m, 2H), 5.53-5.55 (m, 1H);  $^{13}\text{C}$  NMR (75 MHz,  $\text{CDCl}_3$ )  $\delta$  15.1/15.8, 24.2/24.3, 26.5, 26.8/26.9, 27.2, 32.2, 43.3/43.4, 44.4, 65.4, 123.5/123.7, 138.3/138.5; MS  $m/z$  (%) 196 (1.9,  $\text{M}^+$ ), 155 (43), 137 (6.0), 115 (41), 109 (11), 98 (75), 81 (33), 67 (24), 57 (100); Anal. Calcd. for  $\text{C}_{10}\text{H}_{18}\text{O}$ : C, 79.53%; H, 12.32%; Found: C, 79.50%; H, 11.95%.

**2-Cyclohept-1-enyl-ethanol (8):**<sup>9</sup> viscous colorless oil;  $^1\text{H}$  NMR (300 MHz,  $\text{CDCl}_3$ )  $\delta$  1.44-1.52 (m, 4H), 1.71-1.78 (m, 2H, OH), 2.08-2.15 (m, 4H), 2.24 (t,  $J=6.2$  Hz, 2H), 3.63 (t,  $J=6.2$  Hz, 2H), 5.66 (t,  $J=6.4$  Hz, 1H);  $^{13}\text{C}$  NMR (75 MHz,  $\text{CDCl}_3$ )  $\delta$  26.9, 27.4, 28.4, 32.5, 32.6, 43.4, 60.2, 129.6, 140.8.

**Reaction of 2-(4-methyl-cyclohex-1-enyl)-ethanol (4c) with TTN in MeOH.**  
To a stirred solution of **4c** (0.468 g, 3.34 mmol) in MeOH (20 mL) at  $0^\circ\text{C}$  was added  $\text{TTN} \cdot 3\text{H}_2\text{O}$  (1.48 g, 3.34 mmol). The reagent promptly dissolved. The mixture was stirred for 3 minutes and an abundant precipitation was observed. The resulting suspension was filtered through a silica gel pad (70-230 Mesh, ca. 10 cm), using  $\text{CH}_2\text{Cl}_2$  as eluent. The filtrate was then washed with water followed by brine (twice) and dried over anhydrous  $\text{MgSO}_4$ . The solvent was removed under reduced pressure and the crude product was purified by flash chromatography

(CH<sub>2</sub>Cl<sub>2</sub>:AcOEt 9:1 as eluent) affording **5c** (0.166 g, 1.06 mmol, 32%) as a colorless oil.

**Reaction of 2-cyclohept-1-enyl-ethanol (8) with TTN in MeOH.** A mixture of **8** (0.241 g, 1.72 mmol), MeOH (10 mL) and TTN.3H<sub>2</sub>O (0.764 g, 1.72 mmol) was stirred for 2 minutes at 0°C, following the procedure described above. Purification by flash chromatography (gradient elution, 0-50% AcOEt in hexanes) gave **9** (0.125 g, 0.801 mmol, 46%) as a colorless oil.

**Reaction of 2-(4-methyl-cyclohex-1-enyl)-ethanol (4c) with TTN in 35% aqueous HClO<sub>4</sub>.** To a stirred solution of **4c** (0.412 g, 2.94 mmol) in 35% aqueous HClO<sub>4</sub> (9 mL) was added TTN.3H<sub>2</sub>O (1.57 g, 3.53 mmol), which promptly dissolved. The mixture was stirred for 15 minutes at room temperature and water was added. The mixture was extracted with CH<sub>2</sub>Cl<sub>2</sub> (three times) and the combined organic phases were washed with brine (twice) and dried over anhydrous MgSO<sub>4</sub>. The solvent was removed under reduced pressure and the crude product was purified by flash chromatography (gradient elution, 0-50% AcOEt in hexanes) affording **6c** (0.266 g, 1.71 mmol, 58%) as a colorless oil.

**Reaction of 2-(4-*tert*-butyl-cyclohex-1-enyl)-ethanol (4d) with TTN in 35% aqueous HClO<sub>4</sub>.** A mixture of **4d** (0.366 g, 2.01 mmol), 35% aqueous HClO<sub>4</sub> (6 mL) and TTN.3H<sub>2</sub>O (1.07g, 2.40 mmol) was stirred for 15 minutes at room temperature, following the procedure described above. Purification by flash

chromatography (gradient elution 0-50% AcOEt in hexanes) gave **6d** (0.275 g, 1.39 mmol, 69%) as a white solid.

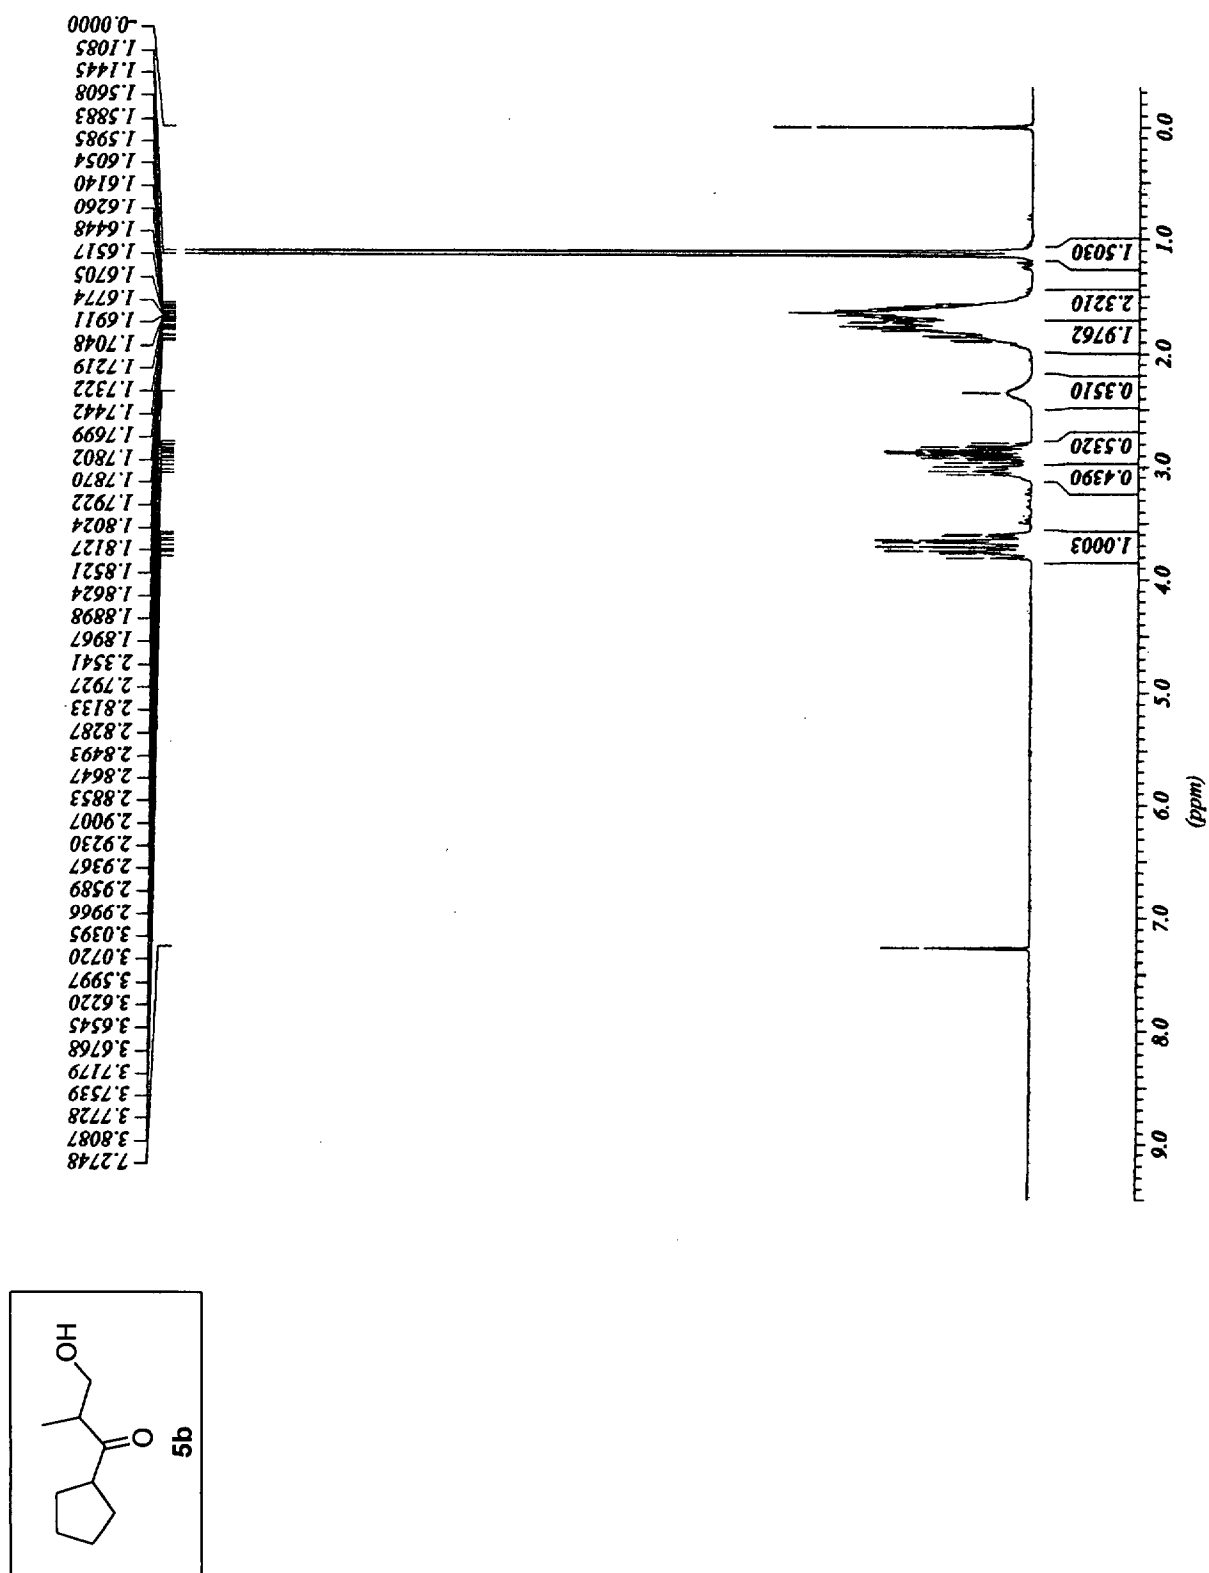

Figure S1. <sup>1</sup>H NMR spectrum of **5b** (CDCl<sub>3</sub>, 200MHz, TMS, δ ppm).



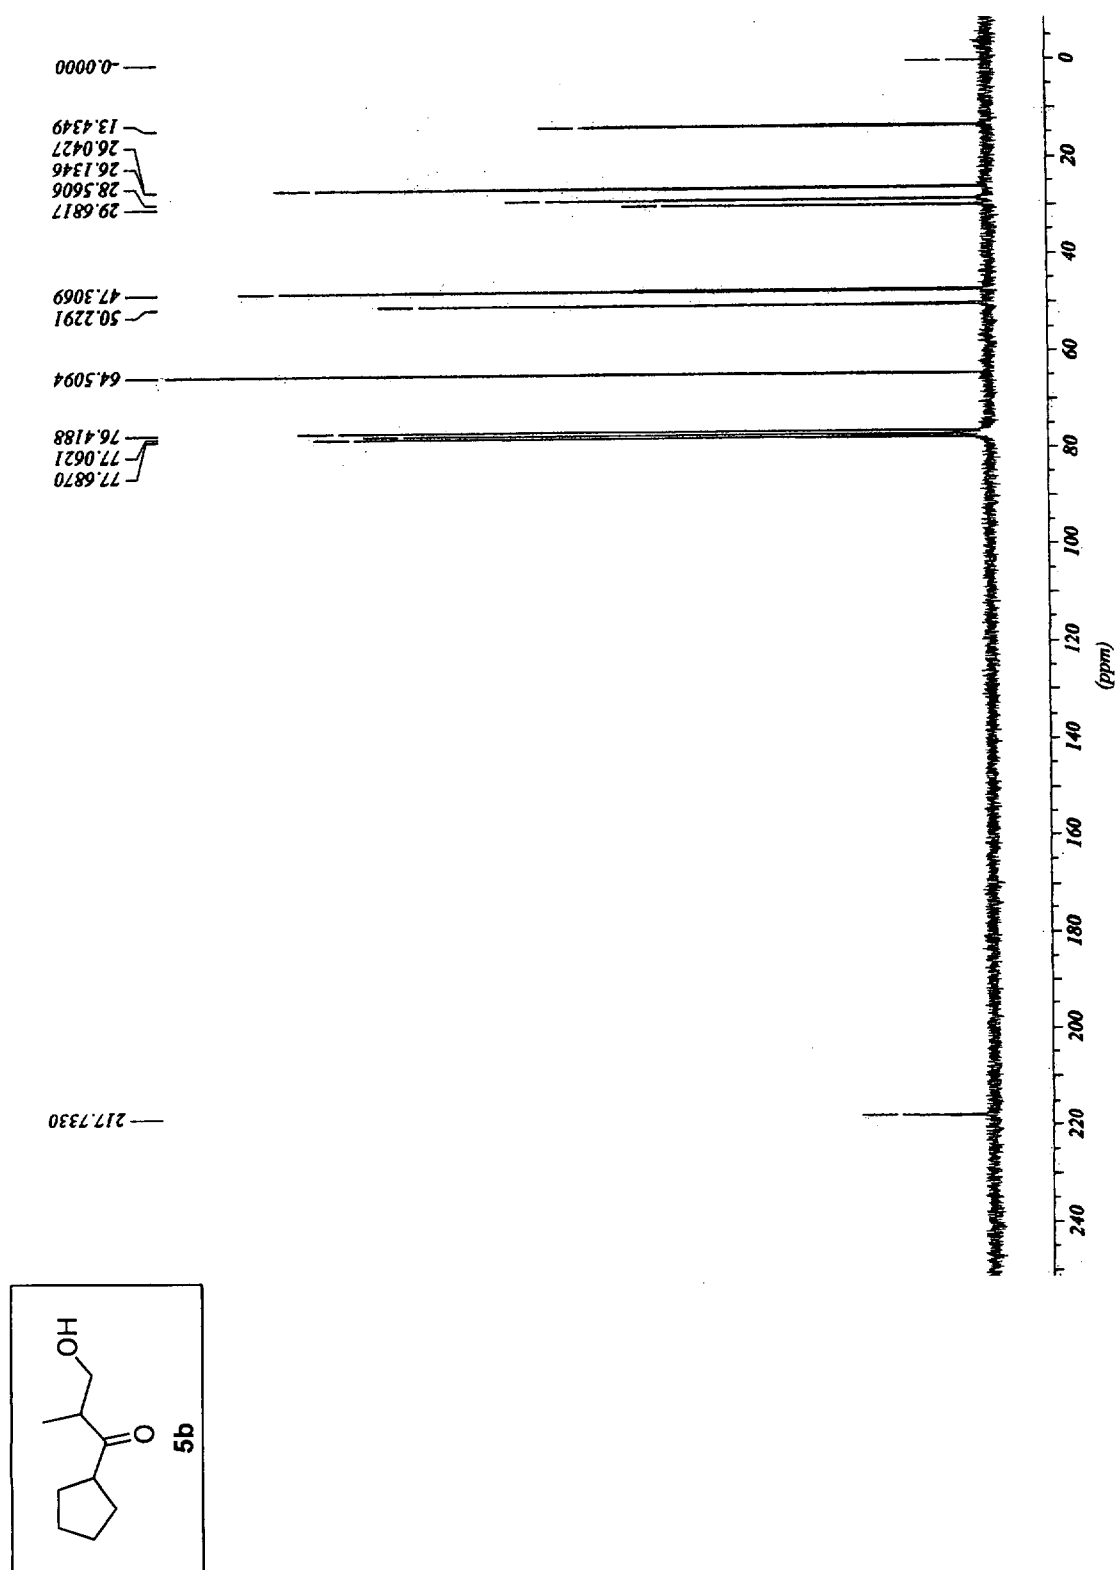

Figure S2. <sup>13</sup>C NMR spectrum of **5b** (CDCl<sub>3</sub>, 50MHz, TMS, δ ppm).

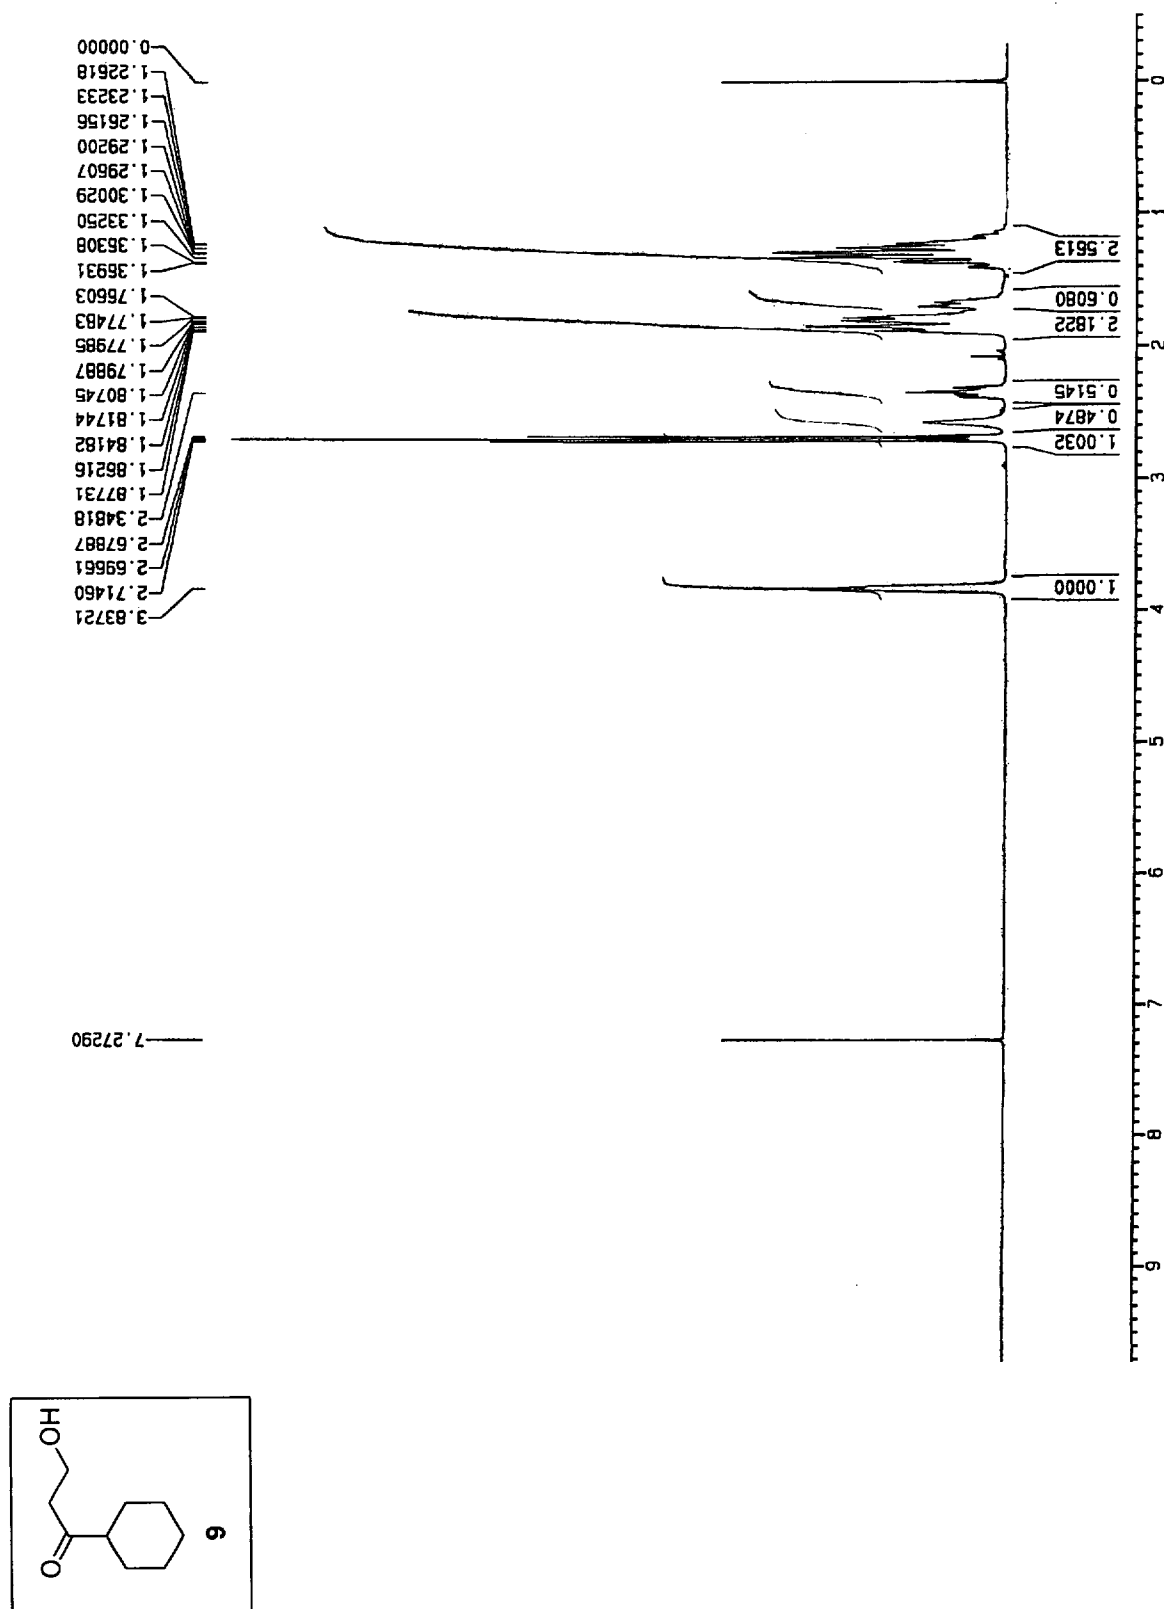

Figure S3. <sup>1</sup>H NMR spectrum of **9** (CDCl<sub>3</sub>, 300MHz, TMS, δ ppm).

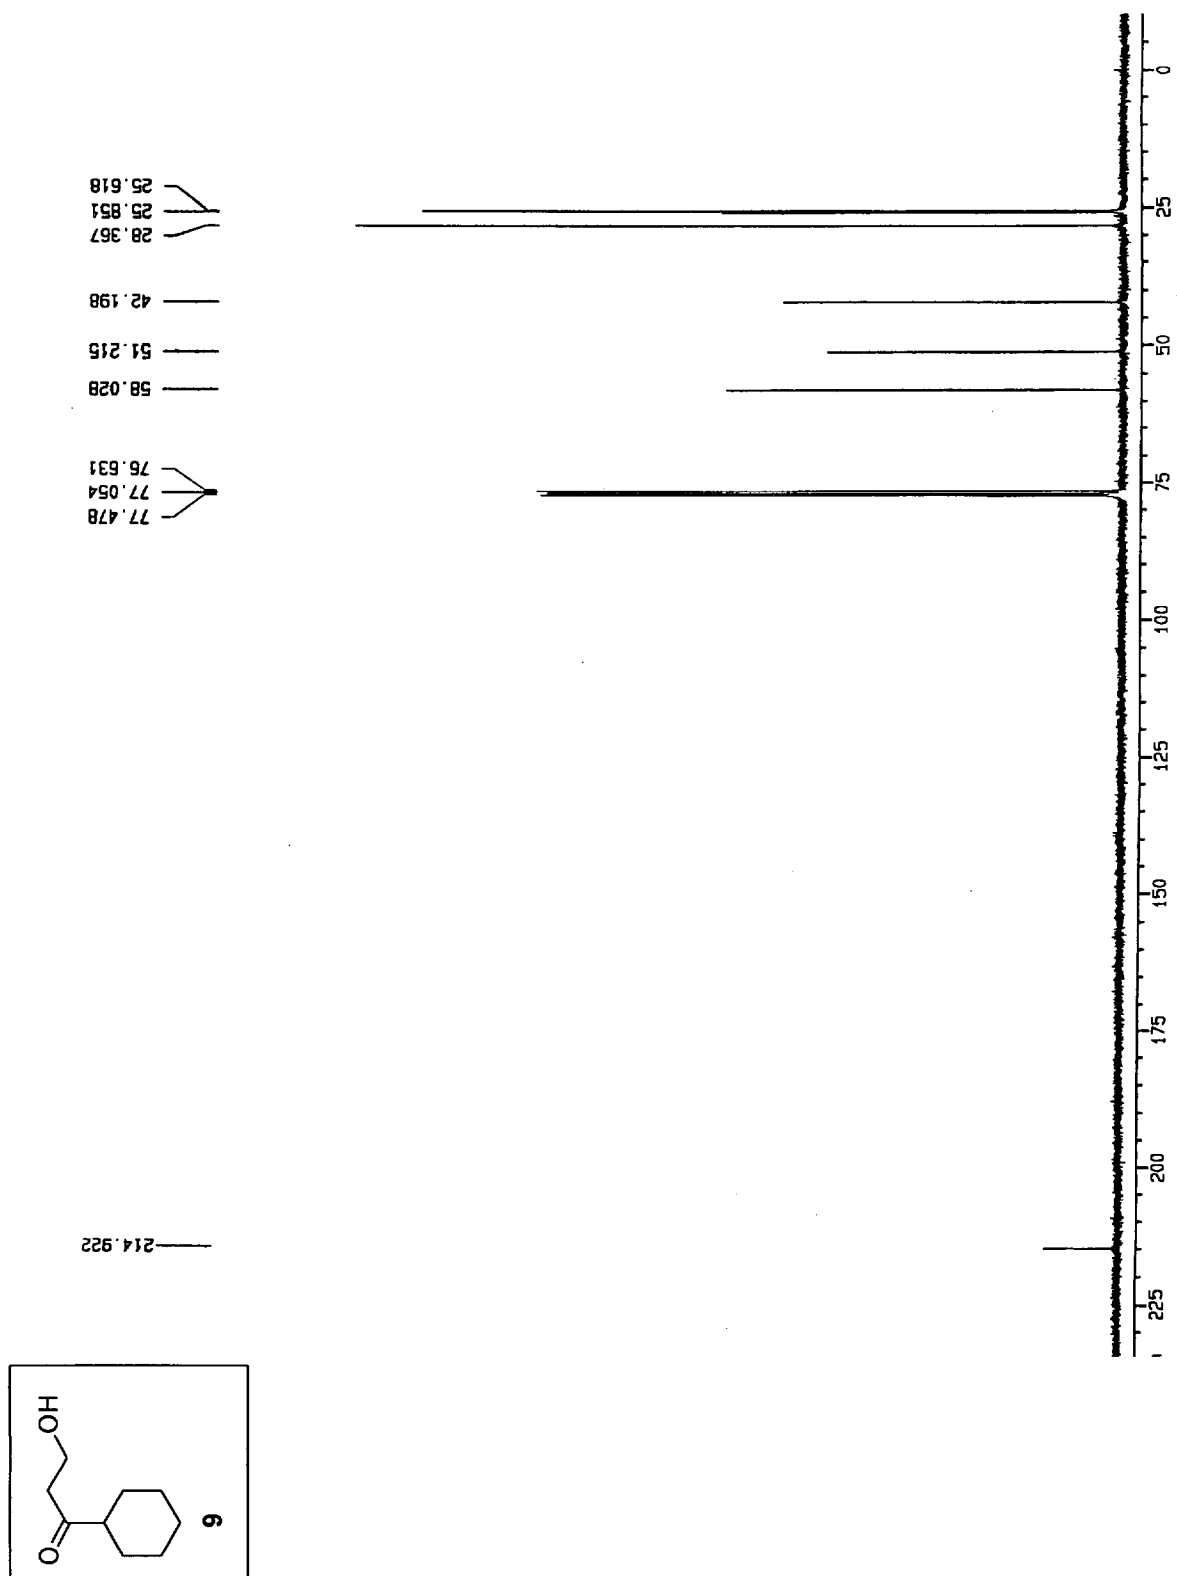

**Figure S4.** <sup>13</sup>C NMR spectrum of **9** (CDCl<sub>3</sub>, 75MHz, TMS, δ ppm).

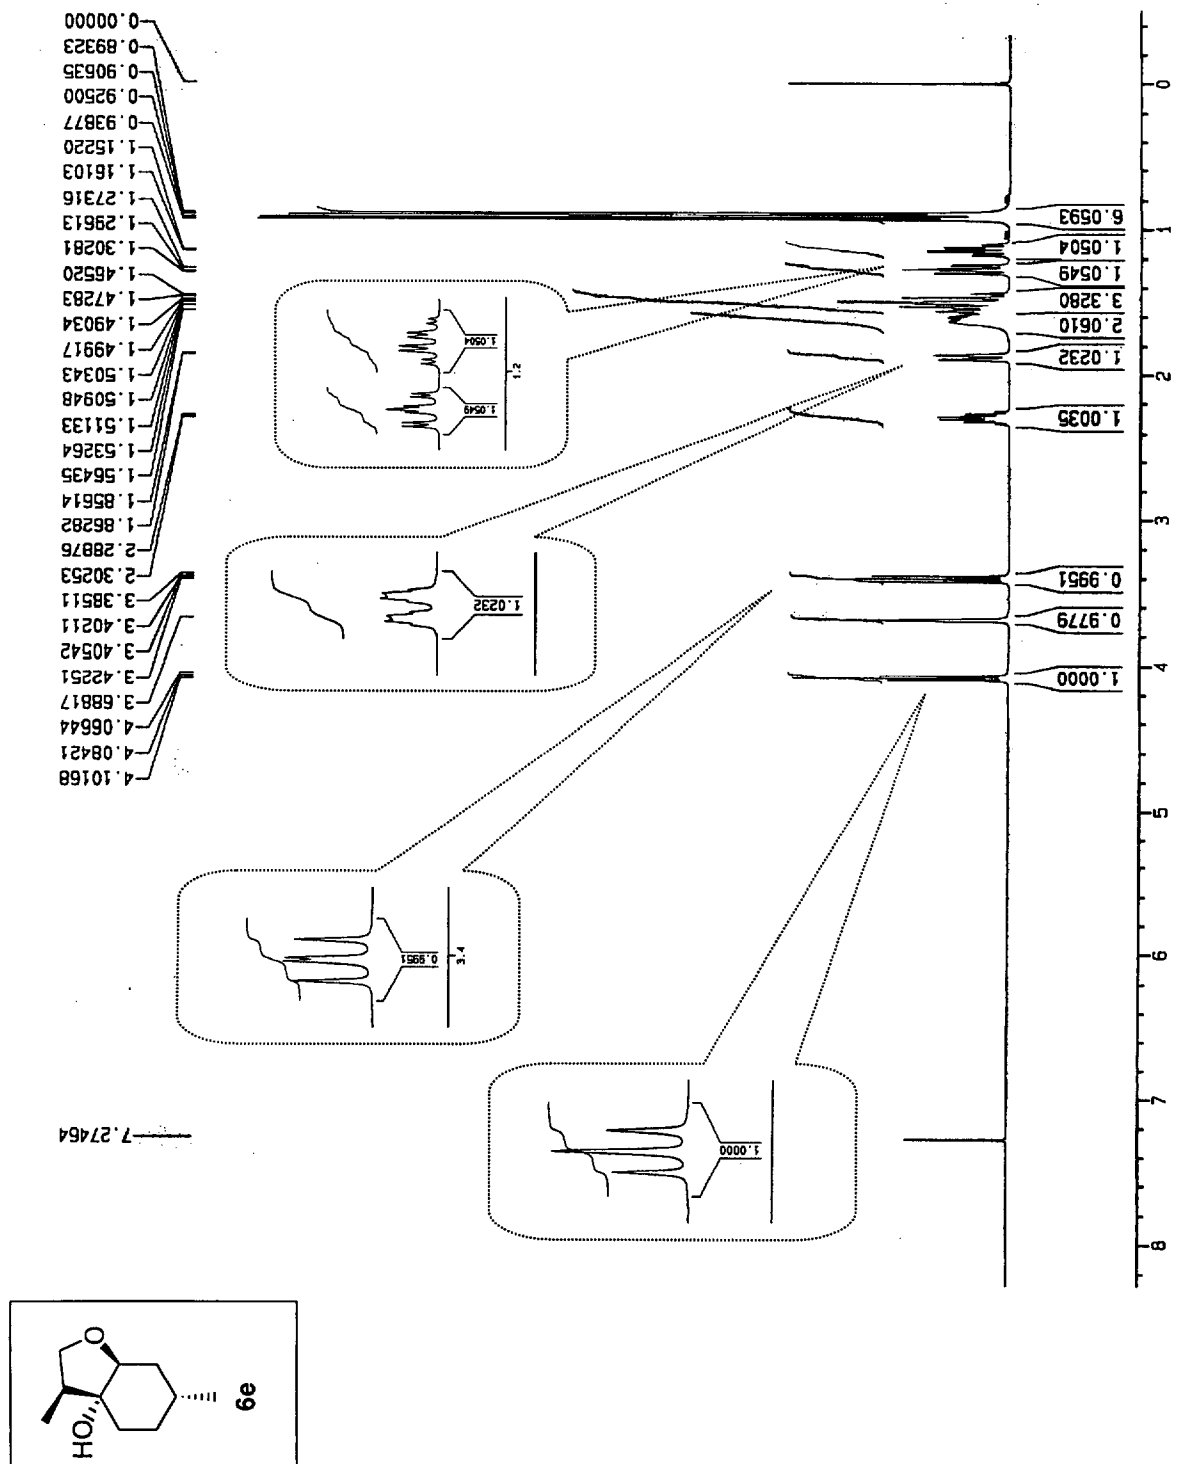

Figure S5. <sup>1</sup>H NMR spectrum of **6e** (CDCl<sub>3</sub>, 500MHz, TMS, δ ppm).

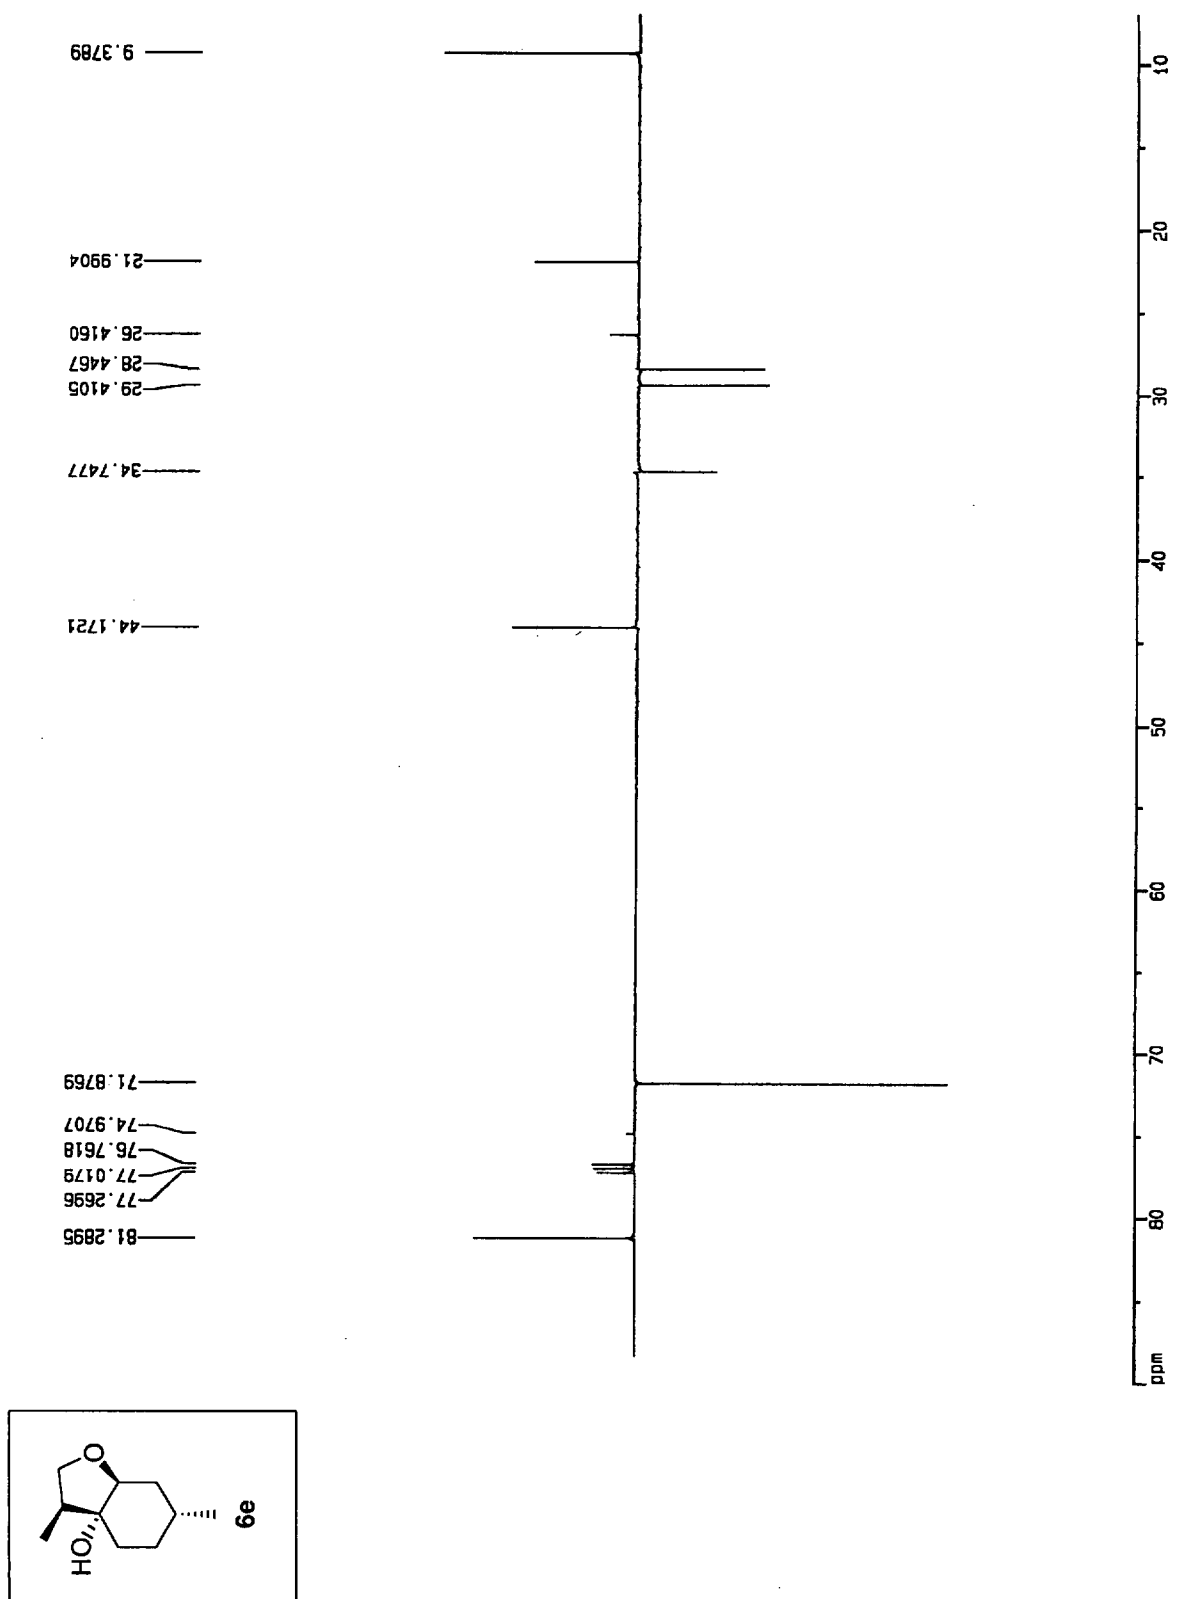

Figure S6. <sup>13</sup>C NMR (PENDANT) spectrum of **6e** (CDCl<sub>3</sub>, 125MHz, TMS, δ ppm).

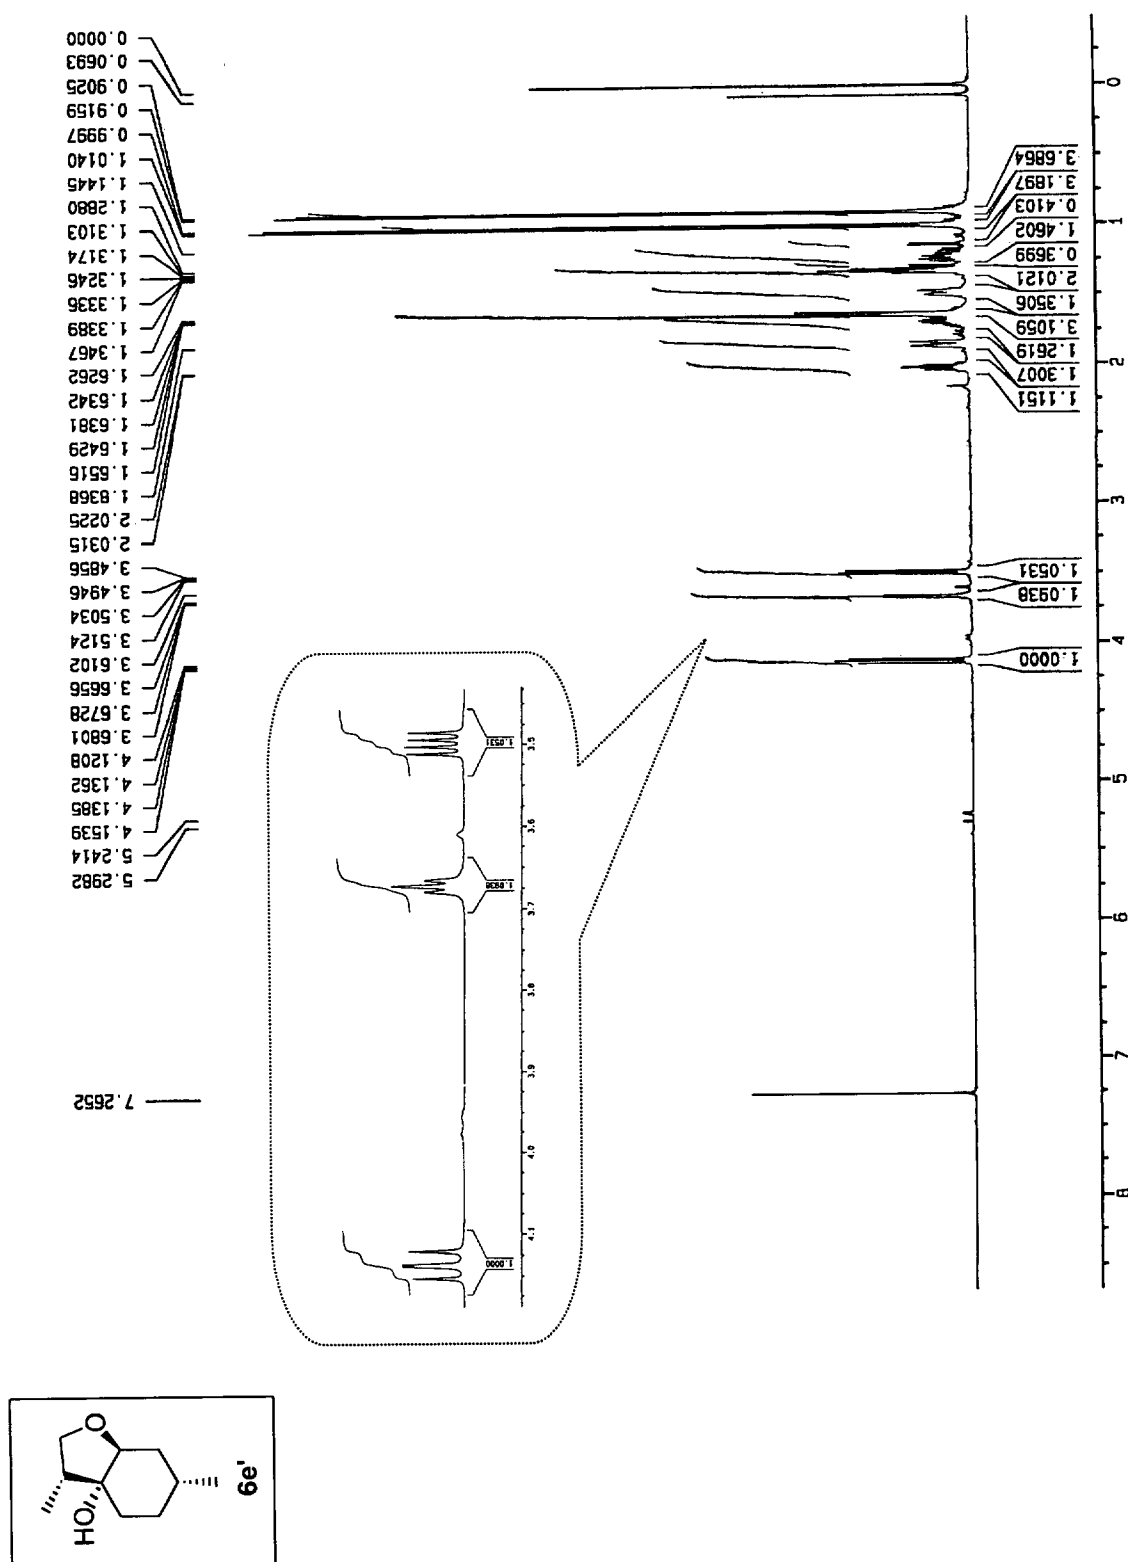

Figure S7. <sup>1</sup>H NMR spectrum of **6e'** (CDCl<sub>3</sub>, 500MHz, TMS, δ ppm).

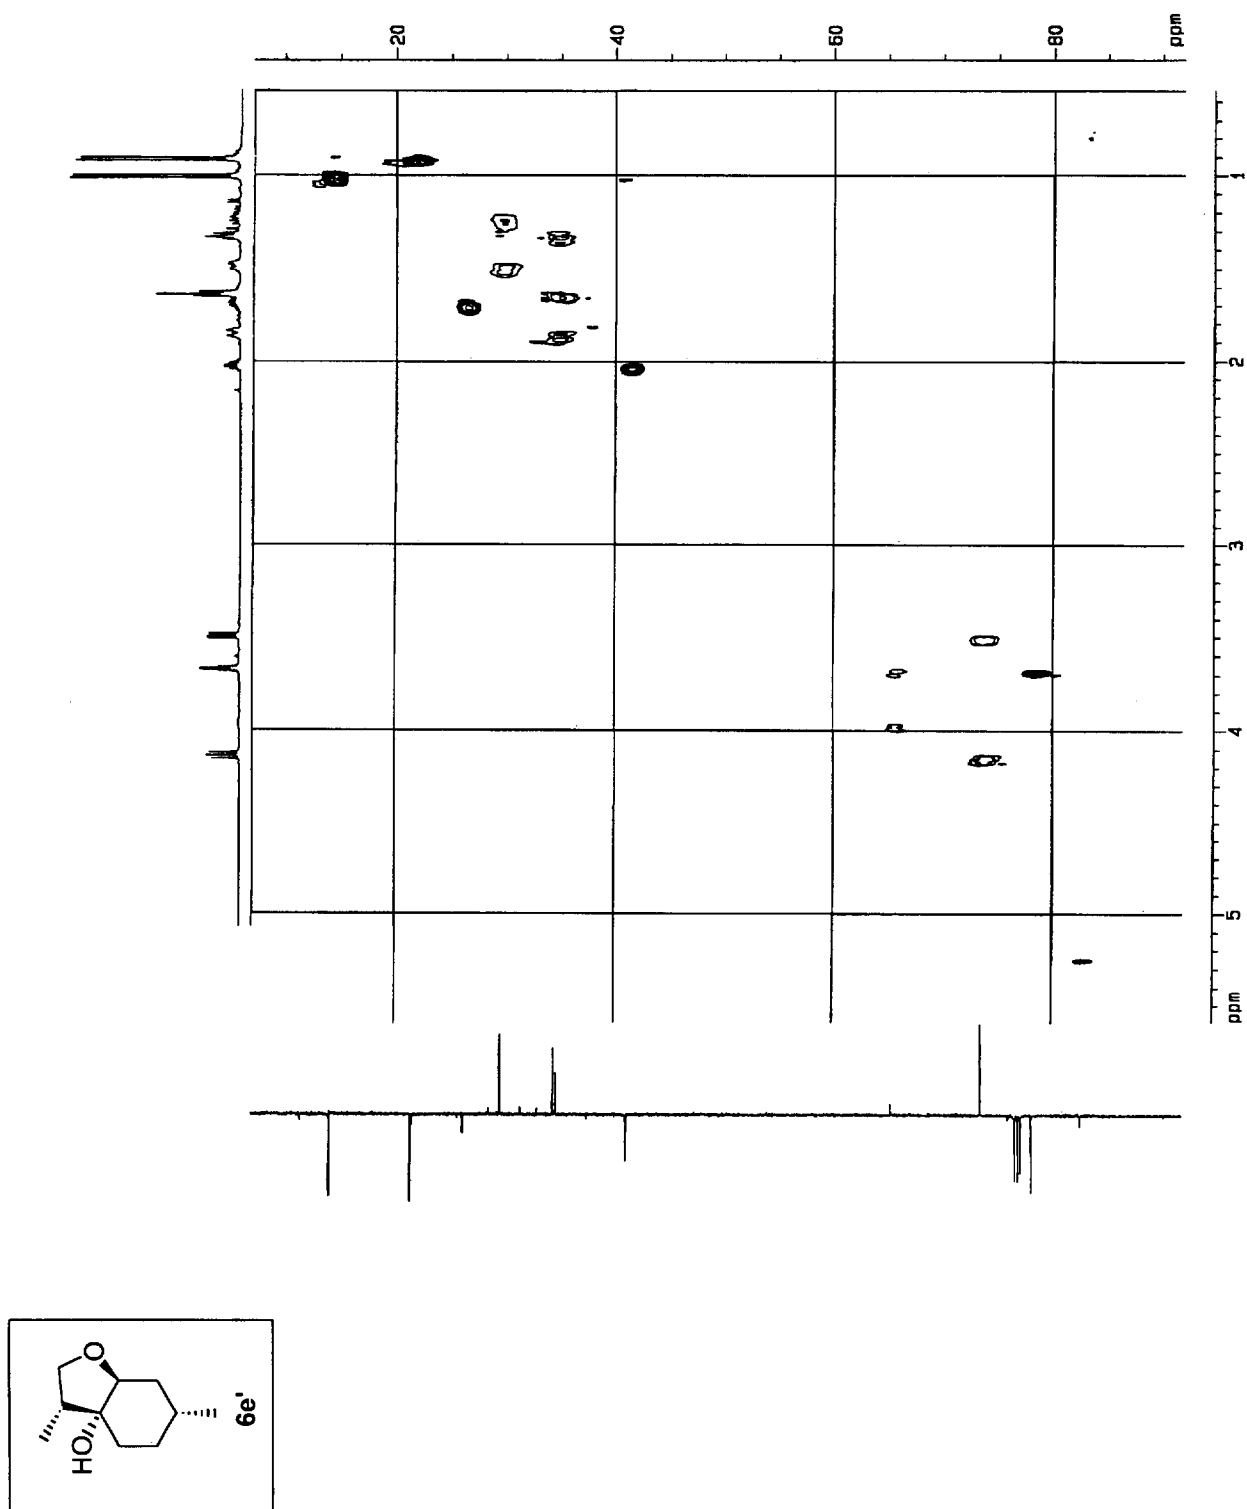

Figure S8. HSQC spectrum of **6e'** ( $\text{CDCl}_3$ , 500MHz, TMS,  $\delta$  ppm).

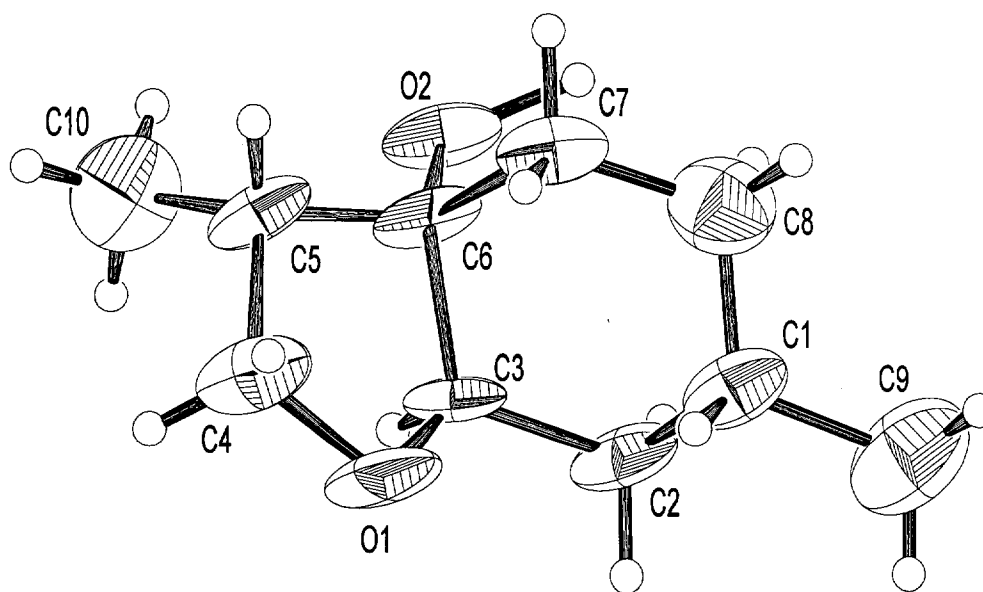

**Figure S9.** ORTEP diagram of the X-ray crystal structure of **6e'**.

Crystal data and structure refinement.

|                                       |                                                                                                                                                                 |
|---------------------------------------|-----------------------------------------------------------------------------------------------------------------------------------------------------------------|
| Empirical formula                     | C10 H18 O2                                                                                                                                                      |
| Formula weight                        | 170.24                                                                                                                                                          |
| Temperature                           | 293(2) K                                                                                                                                                        |
| Wavelength                            | 0.71073 Å                                                                                                                                                       |
| Crystal system, space group           | monoclinic, P21                                                                                                                                                 |
| Unit cell dimensions                  | $a = 5.8358(9) \text{ Å}$ ( $\angle = 90^\circ$ )<br>$b = 9.285(1) \text{ Å}$ ( $\angle = 96.96(1)^\circ$ )<br>$c = 9.343(1) \text{ Å}$ ( $\angle = 90^\circ$ ) |
| Volume                                | 502.52(11) Å <sup>3</sup>                                                                                                                                       |
| Z, Calculated density                 | 2, 1.125 Mg/m <sup>3</sup>                                                                                                                                      |
| Absorption coefficient                | 0.076 mm <sup>-1</sup>                                                                                                                                          |
| F(000)                                | 188                                                                                                                                                             |
| Crystal size                          | 0.10 x 0.10 x 0.04 mm                                                                                                                                           |
| ( $\theta$ range for data collection) | 2.20 to 24.95°                                                                                                                                                  |



|                                |                                     |
|--------------------------------|-------------------------------------|
| Limiting indices               | -6=h=6, 0=k=10, 0=l=10              |
| Reflections collected / unique | 890 / 837 [R(int) = 0.0176]         |
| Refinement method              | Full-matrix least-squares on F2     |
| Data / restraints / parameters | 837 / 1 / 111                       |
| Goodness-of-fit on F2          | 1.065                               |
| Final R indices [I>2sigma(I)]  | R1 = 0.0655, wR2 = 0.1734           |
| R indices (all data)           | R1 = 0.1244, wR2 = 0.2066           |
| Largest diff. peak and hole    | 0.244 and -0.362 e. Å <sup>-3</sup> |

Atomic coordinates (x 104) and equivalent isotropic displacement parameters (Å<sup>2</sup> x 103). U(eq) is defined as one third of the trace of the orthogonalized U<sub>ij</sub> tensor.

|       | x        | y        | z        | U(eq) |
|-------|----------|----------|----------|-------|
| O(1)  | 343(6)   | 2396(6)  | 8522(6)  | 67(2) |
| O(2)  | 6021(6)  | 3689(5)  | 8393(5)  | 56(1) |
| C(1)  | 4245(8)  | 2613(7)  | 8296(7)  | 47(2) |
| C(2)  | 4445(10) | 1598(7)  | 7039(8)  | 56(2) |
| C(3)  | 3768(12) | 2268(9)  | 5586(9)  | 67(2) |
| C(4)  | 1344(11) | 2832(8)  | 5449(8)  | 58(2) |
| C(5)  | 1140(11) | 3970(7)  | 6590(8)  | 55(2) |
| C(6)  | 1949(8)  | 3426(7)  | 8085(8)  | 49(2) |
| C(8)  | 1526(12) | 1436(10) | 9586(9)  | 72(2) |
| C(9)  | 4086(10) | 1777(8)  | 9684(8)  | 55(2) |
| C(10) | 4997(14) | 2534(10) | 11026(9) | 76(2) |
| C(11) | 461(15)  | 3419(13) | 3943(10) | 93(3) |

Bond lengths [Å] and angles [deg].

|            |           |
|------------|-----------|
| O(1)-C(6)  | 1.433(8)  |
| O(1)-C(8)  | 1.447(9)  |
| O(2)-C(1)  | 1.434(7)  |
| C(1)-C(2)  | 1.521(9)  |
| C(1)-C(9)  | 1.524(10) |
| C(1)-C(6)  | 1.530(7)  |
| C(2)-C(3)  | 1.502(11) |
| C(3)-C(4)  | 1.500(9)  |
| C(4)-C(5)  | 1.516(11) |
| C(4)-C(11) | 1.539(10) |
| C(5)-C(6)  | 1.506(9)  |
| C(8)-C(9)  | 1.519(9)  |
| C(9)-C(10) | 1.479(10) |

|                 |          |
|-----------------|----------|
| C(6)-O(1)-C(8)  | 109.4(5) |
| O(2)-C(1)-C(2)  | 110.9(4) |
| O(2)-C(1)-C(9)  | 114.8(5) |
| C(2)-C(1)-C(9)  | 111.1(6) |
| O(2)-C(1)-C(6)  | 106.2(5) |
| C(2)-C(1)-C(6)  | 110.7(5) |
| C(9)-C(1)-C(6)  | 102.6(5) |
| C(3)-C(2)-C(1)  | 113.9(6) |
| C(4)-C(3)-C(2)  | 111.3(5) |
| C(3)-C(4)-C(5)  | 109.7(6) |
| C(3)-C(4)-C(11) | 114.2(6) |
| C(5)-C(4)-C(11) | 110.5(6) |
| C(6)-C(5)-C(4)  | 112.1(6) |
| O(1)-C(6)-C(5)  | 110.3(5) |
| O(1)-C(6)-C(1)  | 103.1(5) |
| C(5)-C(6)-C(1)  | 117.2(5) |
| O(1)-C(8)-C(9)  | 107.3(6) |
| C(10)-C(9)-C(8) | 113.6(6) |
| C(10)-C(9)-C(1) | 115.3(6) |
| C(8)-C(9)-C(1)  | 102.5(5) |

Anisotropic displacement parameters ( $\text{\AA}^2 \times 10^3$ ). The anisotropic displacement factor exponent takes the form:  $-2 \left( h^2 a^{*2} U_{11} + \dots + 2 h k a^* b^* U_{12} \right)$

|       | U11   | U22   | U33    | U23    | U13    | U12    |
|-------|-------|-------|--------|--------|--------|--------|
| O(1)  | 18(2) | 74(4) | 104(4) | 19(3)  | -9(2)  | 0(2)   |
| O(2)  | 21(2) | 43(3) | 99(3)  | -12(3) | -6(2)  | -10(2) |
| C(1)  | 15(3) | 40(4) | 80(5)  | -6(4)  | -16(3) | 3(3)   |
| C(2)  | 30(3) | 40(4) | 94(5)  | -11(4) | -5(3)  | 4(3)   |
| C(3)  | 61(4) | 52(4) | 86(6)  | -5(5)  | 5(4)   | 6(4)   |
| C(4)  | 36(3) | 50(4) | 84(5)  | 12(4)  | -13(3) | 0(3)   |
| C(5)  | 37(3) | 41(4) | 86(5)  | 20(4)  | -2(3)  | 11(3)  |
| C(6)  | 19(3) | 41(4) | 86(5)  | -5(4)  | 1(3)   | 6(3)   |
| C(8)  | 42(4) | 66(5) | 105(6) | 24(5)  | -4(4)  | -2(4)  |
| C(9)  | 30(3) | 42(4) | 85(5)  | 7(4)   | -21(3) | 0(3)   |
| C(10) | 80(5) | 63(5) | 80(5)  | 0(5)   | -4(4)  | -12(5) |
| C(11) | 87(6) | 89(7) | 96(7)  | 15(6)  | -19(4) | 6(6)   |

Hydrogen coordinates ( x 104) and isotropic displacement parameters ( $\text{\AA}^2 \times 10^3$ )

|        | x     | y    | z     | U(eq) |
|--------|-------|------|-------|-------|
| H(2O)  | 6612  | 3635 | 7185  | 67    |
| H(2A)  | 6027  | 1264 | 7090  | 67    |
| H(2B)  | 3473  | 765  | 7136  | 67    |
| H(3A)  | 4818  | 3051 | 5445  | 80    |
| H(3B)  | 3897  | 1555 | 4840  | 80    |
| H(4)   | 337   | 2029 | 5645  | 70    |
| H(5A)  | 2053  | 4803 | 6390  | 66    |
| H(5B)  | -457  | 4273 | 6545  | 66    |
| H(6)   | 2040  | 4241 | 8755  | 58    |
| H(8B)  | 1247  | 442  | 9299  | 87    |
| H(8A)  | 977   | 1582 | 10515 | 87    |
| H(9)   | 4933  | 870  | 9636  | 65    |
| H(10A) | 6531  | 2871 | 10948 | 113   |
| H(10B) | 5031  | 1883 | 11827 | 113   |
| H(10C) | 4019  | 3338 | 11175 | 113   |
| H(11A) | 1332  | 4259 | 3750  | 140   |
| H(11B) | -1141 | 3669 | 3908  | 140   |
| H(11C) | 641   | 2696 | 3231  | 140   |

## References

- (1) For a review concerning Reformatsky Reaction, see: Rathke, M.W. In *Organic Reactions*; Dauben, W.G., Ed.; John Wiley & Sons: New York, 1975; Vol. 22, p 423; and references cited therein.
- (2) Trost, B.M.; Runge, T.A. *J. Am. Chem. Soc.* **1981**, *103*, 7550.
- (3) (a) Benkeser R.A.; Arnold, Jr., C.; Lambert, R.F.; Thomas, O.H. *J. Am. Chem. Soc.* **1955**, *77*, 6042; (b) Barluenga, J.; Alvarez, F.; Concellon, J.M.; Yus, M. *Synthesis* **1986**, 654.
- (4) Zinc powder was activated by washing several times with 10% aqueous HCl, water, saturated aqueous HgCl<sub>2</sub>, water, ethanol and acetone. The zinc obtained was then dried in an oven (ca. 120 °C) and stored in a desiccator.
- (5) Thionyl chloride was distilled from linseed oil (50 g of SOCl<sub>2</sub>/20 g of linseed oil).
- (6) Barluenga, J.; Alvarez, F.; Concellon, J.M.; Yus, M. *J. Chem. Res. (M)* **1987**, 3264.
- (7) Carr, G.; Dean, C.; Whittaker, D. *J. Chem. Soc. Perkin. Trans II* **1988**, 351.
- (8) Maruoka, K.; Concepcion, A.B.; Murase, N.; Oishi, M.; Hirayama, N.; Yamamoto, H. *J. Am. Chem. Soc.* **1993**, *115*, 3943.
- (9) (a) Lillie, T.S.; Ronald, R.C. *J. Org. Chem.* **1985**, *50*, 5884; (b) Das, J.; Chandrasekaran, S. *Tetrahedron*, **1994**, *50*, 11709.
